# Supplementary material for: Quantitative image analysis of immunohistochemical stains using a CMYK color model
Source: PubMed Central journal article supplement (PMC1810239; doi:10.1186/1746-1596-2-8), 2007-02-27
Supplement: 1746-1596-2-8-S1.pdf [file 1746-1596-2-8-S1.pdf]

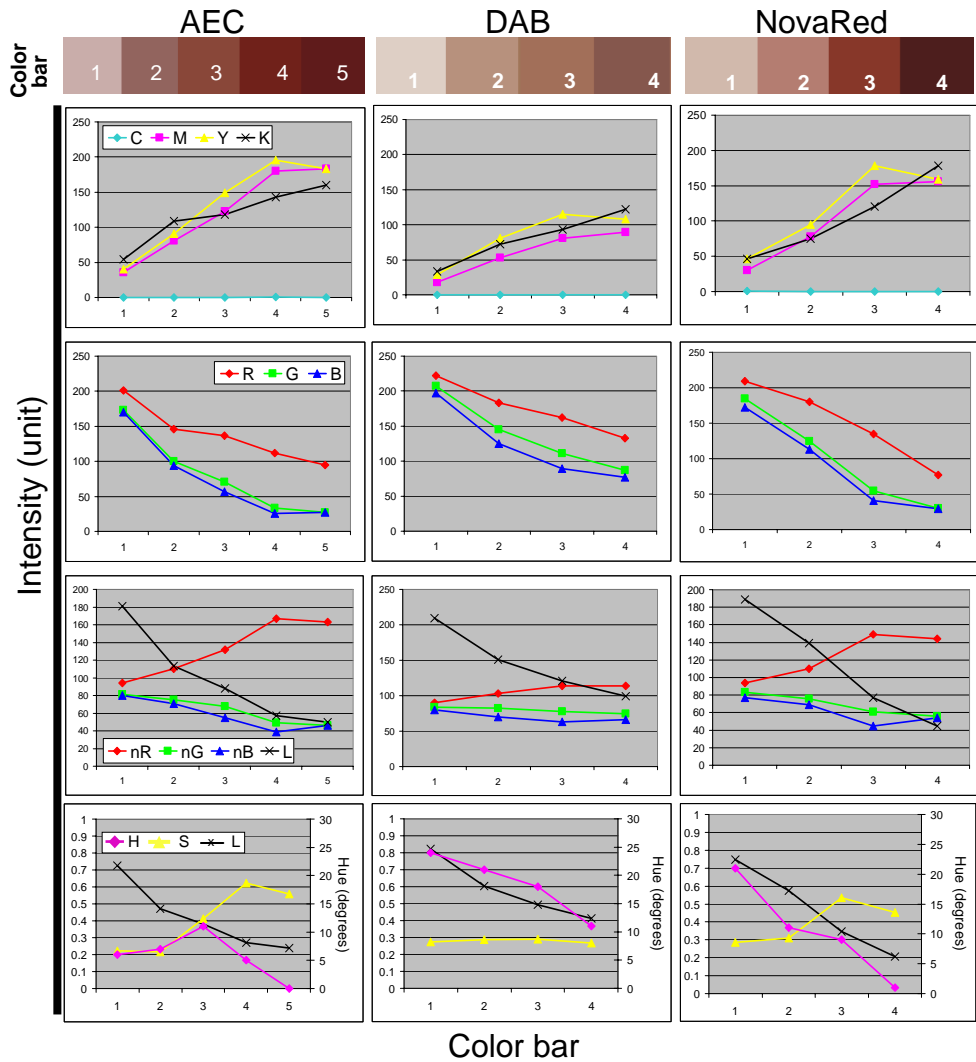

**Supplementary Figure 1 Chromogen spectral characteristics.** Color bars representing IHC stains without hematoxylin counterstain are defined by the individual channels of the different color models, CMYK, RGB, nRGB and HSL in each row.
