# Supplementary material for: Quantitative image analysis of immunohistochemical stains using a CMYK color model
Source: PubMed Central journal article supplement (PMC1810239; doi:10.1186/1746-1596-2-8), 2007-02-27
Supplement: 1746-1596-2-8-S2.pdf [file 1746-1596-2-8-S2.pdf]

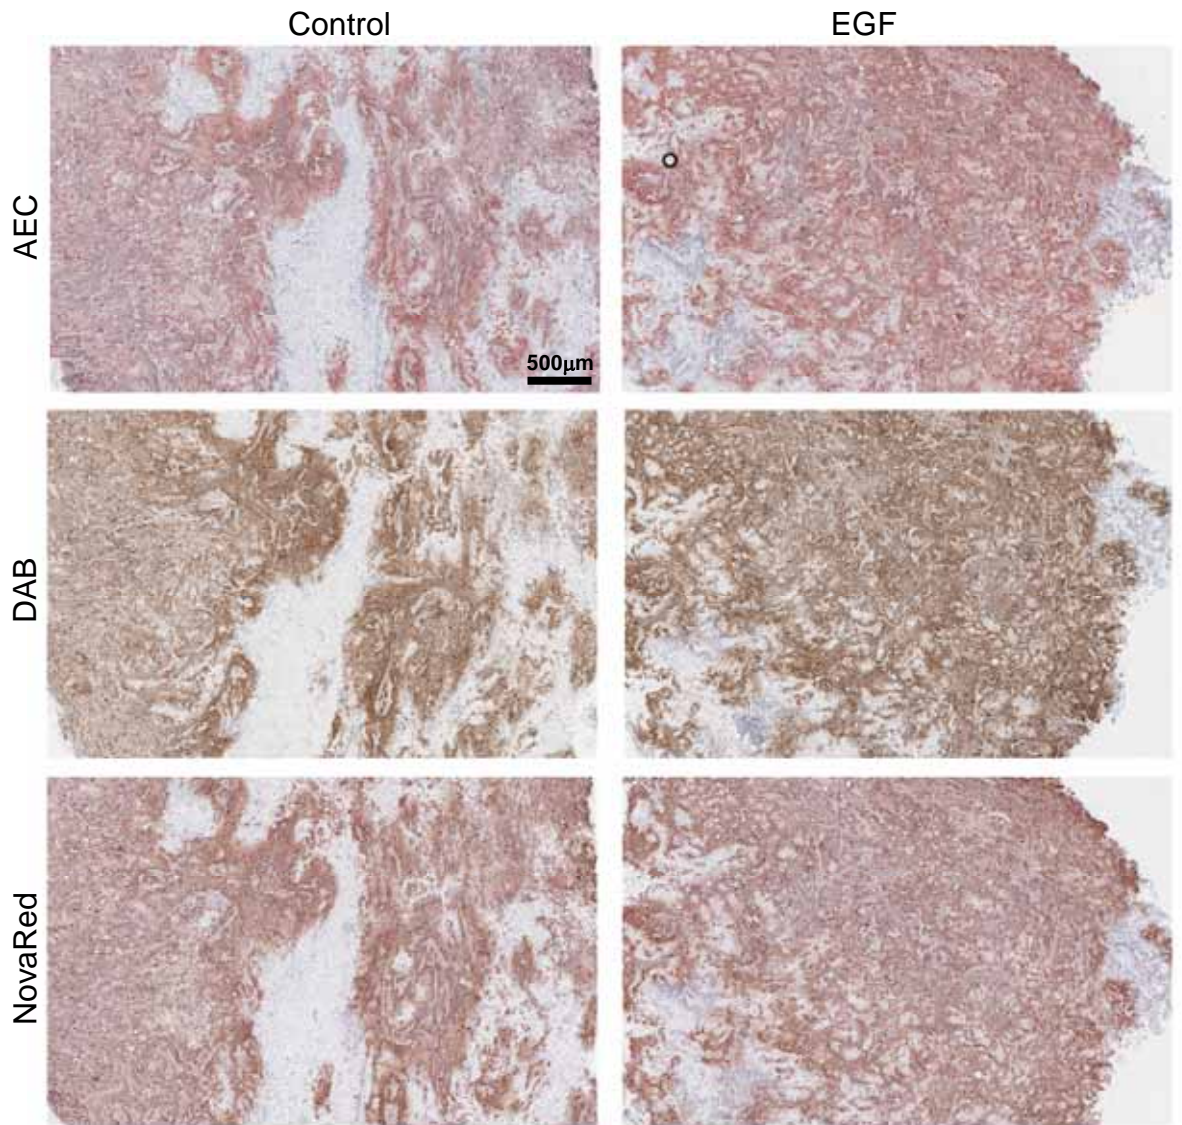

Supplementary Figure 2. Levels of  $S^{727}$ p-STAT3 was examined in a tumor xenograft specimen divided for EGF stimulation compared to control. Serial sections were stained with the different chromogens and hematoxylin counterstained.
